# Supplementary material for: Effects of Carbon, Nitrogen, Ambient pH and Light on Mycelial Growth, Sporulation, Sorbicillinoid Biosynthesis and Related Gene Expression in Ustilaginoidea virens
Source: MDPI journal article supplement (doi:10.3390/jof9040390), 2023-03-23
Supplement: s1 [file s1]

## Supplementary Materials:

# Effects of Carbon, Nitrogen, Ambient pH and Light on Mycelial Growth, Sporulation, Sorbicillinoid Biosynthesis and Related Gene Expression in *Ustilaginoidea virens*

Xuping Zhang, Xuwen Hou, Dan Xu, Mengyao Xue, Jiayin Zhang, Jiacheng Wang, Yonglin Yang, Daowan Lai, and Ligang Zhou \*

Department of Plant Pathology, College of Plant Protection, China Agricultural University, Beijing 100193, China; zhangxuping5@cau.edu.cn (X.Z.); xwhou@cau.edu.cn (X.H.); cauxudan@cau.edu.cn (D.X.); mengyaoxue@cau.edu.cn (M.X.); jiayinzhang@cau.edu.cn (J.Z.); yonglinyong@cau.edu.cn (Y.Y.)

\* Correspondence: lgzhou@cau.edu.cn; Tel.: +86-10-6273-1199

## Contents

|                                                                                                                                                                                                                                                                                                                                                                                                                                                                                                                                                                                                                                                                                                                                                                                                                                                 |    |
|-------------------------------------------------------------------------------------------------------------------------------------------------------------------------------------------------------------------------------------------------------------------------------------------------------------------------------------------------------------------------------------------------------------------------------------------------------------------------------------------------------------------------------------------------------------------------------------------------------------------------------------------------------------------------------------------------------------------------------------------------------------------------------------------------------------------------------------------------|----|
| <b>Figure S1.</b> Effects of ambient pH on the production of main sorbicillinoids in <i>U. virens</i> . (A) Chemical structures of trichotetronine, demethylthyltrichodimerol and trichodimerol; (B) HPLC profiles of the <i>U. virens</i> cultivated in PBGY medium with different ambient pH values. ....                                                                                                                                                                                                                                                                                                                                                                                                                                                                                                                                     | S3 |
| <b>Figure S2.</b> Comparisons of the colony extension, mycelial growth and sporulation of wild-type (WT) strain P1 and gene deletion mutants ( $\Delta UvSorR1$ and $\Delta UvSorR2$ ) of <i>U. virens</i> cultured on PDA medium at 28 °C for 18 days. The colony diameter (mm), mycelial biomass (mg) and sporulation (conidia/mm <sup>2</sup> ) were measured to statistical analysis. The error bars represent the standard deviations, and the asterisks represent significant differences at $p < 0.05$ . All data showed that $\Delta UvSorR1$ and $\Delta UvSorR2$ mutants had no significant differences with WT strain. ....                                                                                                                                                                                                          | S4 |
| <b>Figure S3.</b> Expressions of global regulator genes in <i>U. virens</i> grown on different carbon and nitrogen sources, ambient pH, and light treatments. Data were analyzed using the $2^{-\Delta\Delta Ct}$ method, and normalized using the $\beta$ -tubulin as housekeeping gene. (A) Relative expression analysis of <i>UvCreA</i> gene under the various carbon sources; (B) Relative expression analysis of <i>UvAreA</i> gene under the various nitrogen sources; (C) Relative expression analysis of <i>UvPacC</i> gene under different ambient pH; (D) Relative expression analysis of velvet complex ( <i>UvLaeA</i> , <i>UvVeA</i> , and <i>UvVelB</i> ) under different light exposure treatments. Different letters in each figure mean significant difference according to Duncan's Multiple Range Test ( $p < 0.05$ ). .... | S5 |
| <b>Table S1.</b> Fungal strains and plasmids used in this study. ....                                                                                                                                                                                                                                                                                                                                                                                                                                                                                                                                                                                                                                                                                                                                                                           | S6 |
| <b>Table S2.</b> Primers used in this study. ....                                                                                                                                                                                                                                                                                                                                                                                                                                                                                                                                                                                                                                                                                                                                                                                               | S7 |
| <b>Table S3.</b> Effects of carbon sources on contents and yields of main sorbicillinoids (trichotetronine, demethylthyltrichodimerol, trichodimerol) in <i>U. virens</i> . ....                                                                                                                                                                                                                                                                                                                                                                                                                                                                                                                                                                                                                                                                | S9 |
| <b>Table S4.</b> Effects of nitrogen sources on contents and yields of main sorbicillinoids (trichotetronine, demethylthyltrichodimerol, trichodimerol) in <i>U. virens</i> . ....                                                                                                                                                                                                                                                                                                                                                                                                                                                                                                                                                                                                                                                              | S9 |

**Table S5.** Effects of ambient pH on contents and yields of main sorbicillinoids (trichotetronine, demethylthyltrichodimerol, trichodimerol) in *U. virens*. ..... S10

**Table S6.** Effects of light exposure on contents and yields of main sorbicillinoids (trichotetronine, demethylthyltrichodimerol, trichodimerol) in *U. virens*. ..... S11

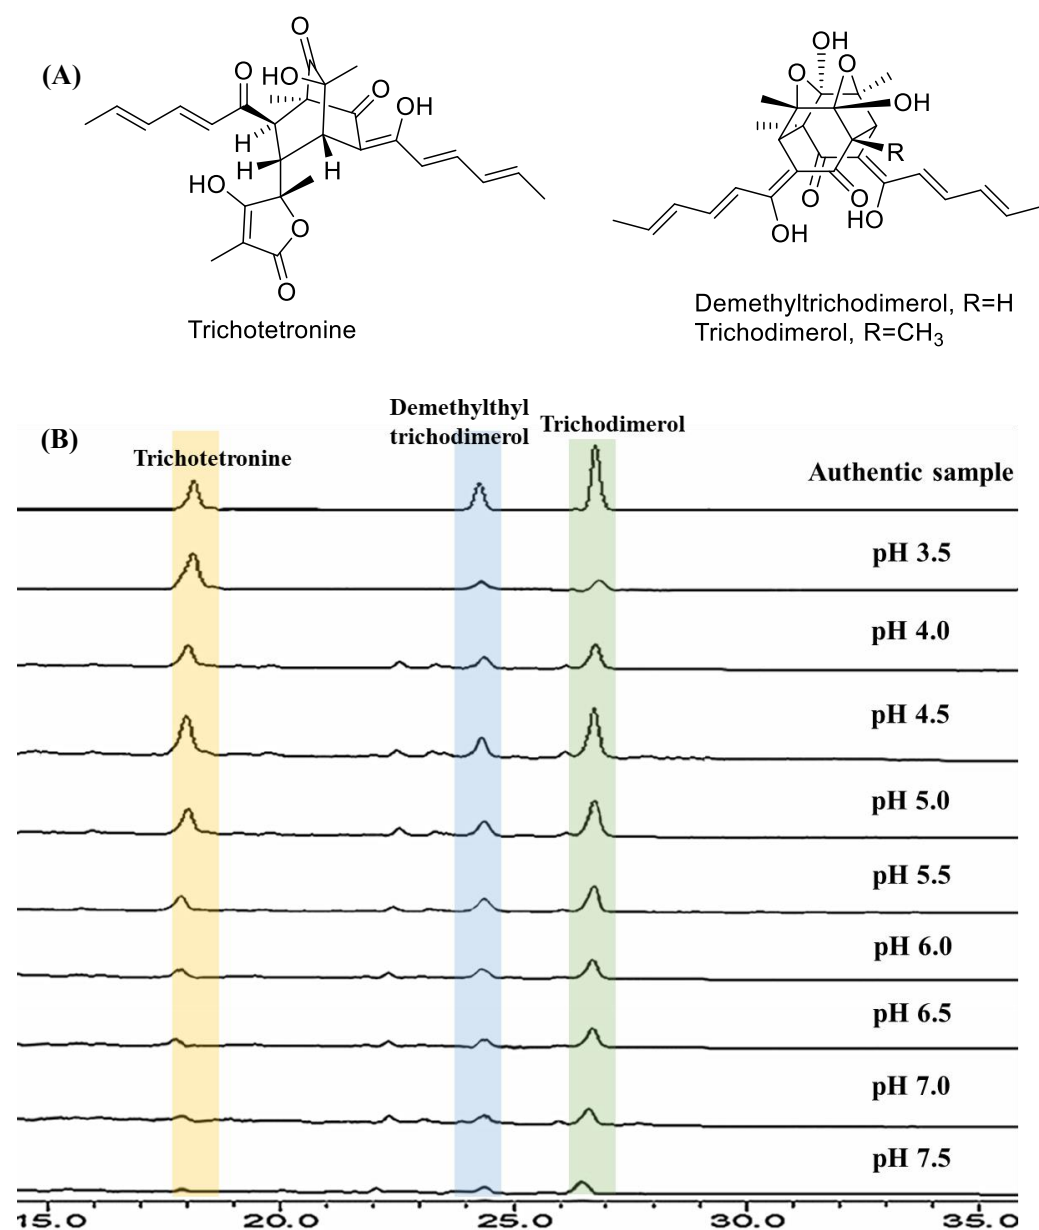

**Figure S1.** Effects of ambient pH on the production of main sorbicillinoids in *U. virens*. (A) Chemical structures of trichotetronine, demethylthyltrichodimerol and trichodimerol; (B) HPLC profiles of the *U. virens* cultivated in PBGY medium with different ambient pH values.

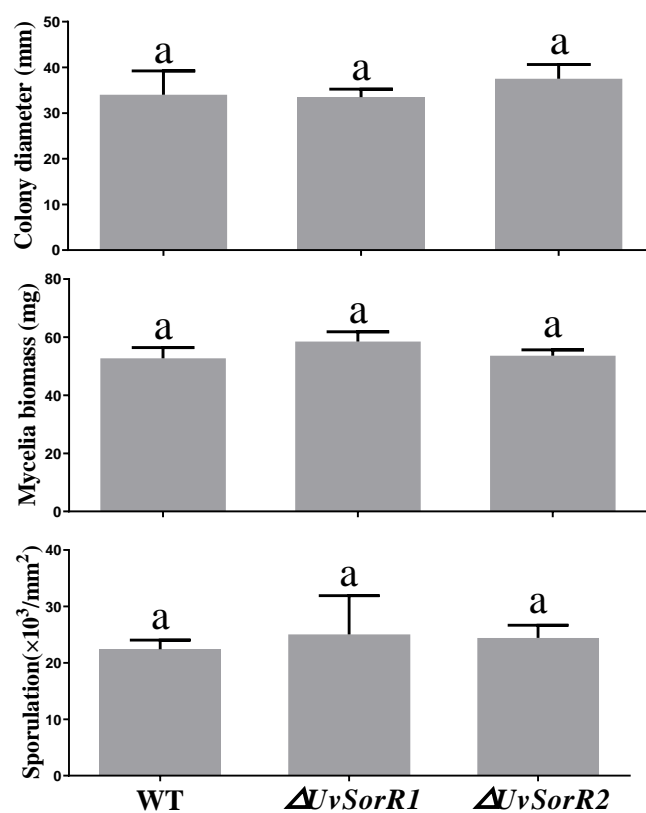

**Figure S2.** Comparisons of the colony extension, mycelial growth and sporulation of wild-type (WT) strain P1 and gene deletion mutants ( $\Delta UvSorR1$  and  $\Delta UvSorR2$ ) of *U. virens* cultured on PDA medium at 28 °C for 18 days. The colony diameter (mm), mycelial biomass (mg) and sporulation (conidia/mm<sup>2</sup>) were measured to statistical analysis. The error bars represent the standard deviations, and the asterisks represent significant differences at  $p < 0.05$ . All data showed that  $\Delta UvSorR1$  and  $\Delta UvSorR2$  mutants had no significant differences with WT strain.

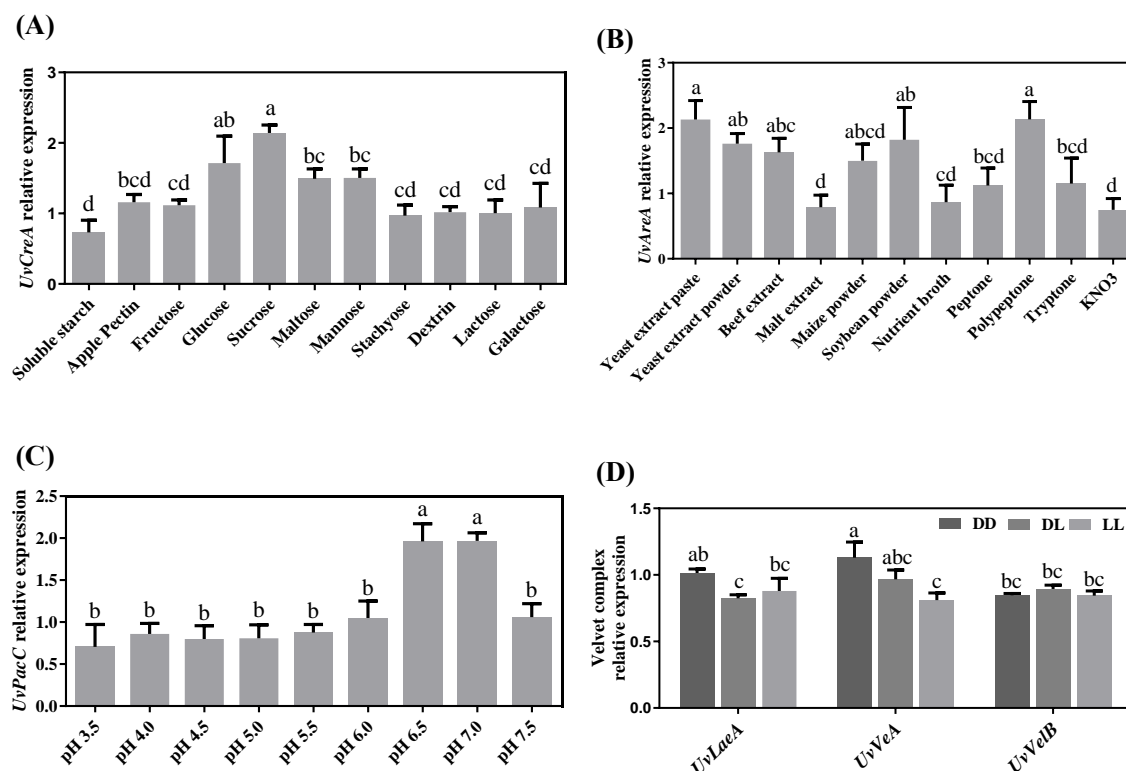

**Figure S3.** Expressions of global regulator genes in *U. virens* grown on different carbon and nitrogen sources, ambient pH, and light treatments. Data were analyzed using the  $2^{-\Delta\Delta C_t}$  method, and normalized using the  $\beta$ -tubulin as housekeeping gene. **(A)** Relative expression analysis of *UvCreA* gene under the various carbon sources; **(B)** Relative expression analysis of *UvAreA* gene under the various nitrogen sources; **(C)** Relative expression analysis of *UvPacC* gene under different ambient pH; **(D)** Relative expression analysis of velvet complex (*UvLaeA*, *UvVeA*, and *UvVelB*) under different light exposure treatments. Different letters in each figure mean significant difference according to Duncan's Multiple Range Test ( $p < 0.05$ ).

**Table S1.** Fungal strains and plasmids used in this study.

| Fungal Strain/Plasmid |                               | Description                                    | Ref.       |
|-----------------------|-------------------------------|------------------------------------------------|------------|
| <b>Fungal strain</b>  | <i>Ustilagoidea virens</i> P1 | Wild-type                                      | [57]       |
|                       | $\Delta UvSorR1$              | <i>UvSorR1</i> deletion mutant of wild type P1 | This study |
|                       | $\Delta UvSorR2$              | <i>UvSorR2</i> deletion mutant of wild type P1 | This study |
| <b>Plasmid</b>        | pCas9-tRp-gRNA                | Cas9-gRNA vector with the tRNA promoter        | [58]       |
|                       | pFL2                          | pFL2 containing geneticin-resistance (GenR)    | [71]       |
|                       | pCas9-tRp-UvSorR1             | Cas9-gRNA vector with the UvSorR1 spacer       | This study |
|                       | pCas9-tRp-UvSorR2             | Cas9-gRNA vector with the UvSorR2 spacer       | This study |

Note: This table is supplemental to the experimental procedure.

**Table S2.** Primers used in this study.

| Primer              | Oligonucleotide Sequence (5'-3')                    | Uses                                                |
|---------------------|-----------------------------------------------------|-----------------------------------------------------|
| UvSorR1_5F          | CGGACCTCGTCATCTTCAT                                 | <i>UvSorR1</i> ' 5 flanks amplification             |
| UvSorR1_5R          | CAGATACGGCAGAGAAATCGCAACCTCA<br>AGAGCGAGACATTCAGGGA |                                                     |
| UvSorR1_3F          | GTTTAGATTCCAAGTGTCTACTGCTGGCG<br>GAAGAACAACACGACCAT | <i>UvSorR1</i> ' 3 flanks amplification             |
| UvSorR1_3R          | ACGGCAAGATGACAGACAG                                 |                                                     |
| UvSorR1_F           | GCTACGCTTGGCATCCTTG                                 | <i>UvSorR1</i> transformant screening               |
| UvSorR1_R           | CGTATTAGCAACCCGAGACC                                |                                                     |
| KOUvSorR1_5F        | TGATGATGAGGCGGTGAAG                                 | <i>UvSorR1</i> transformants 5F and 3F<br>screening |
| KOUvSorR1_3R        | TAGCCCATCCTGCCTGACT                                 |                                                     |
| UvSorR1_spacer_F    | ACCTAAGAAGGAGAGATCTGACCG                            | Constructing pCas9-tRp-UvSorR1 vector               |
| UvSorR1_spacer_R    | AAACCGGTCAGATCTCTCCTTCTT                            |                                                     |
| UvSorR2_5F          | GAACGCTCGGTTTCCTGTG                                 | <i>UvSorR2</i> ' 5 flanks amplification             |
| UvSorR2_5R          | CAGATACGGCAGAGAAATCGCAACCTCG<br>AACGGCAAATCGCAGTAG  |                                                     |
| UvSorR2_3F          | GTTTAGATTCCAAGTGTCTACTGCTGGCA<br>TGGAGTTACGCCAGGAG  | <i>UvSorR2</i> ' 3 flanks amplification             |
| UvSorR2_3R          | GCTGTGCTGAACGCTCTTG                                 |                                                     |
| UvSorR2_F           | CACCATCACAGCCACGAAT                                 | <i>UvSorR2</i> transformant screening               |
| UvSorR2_R           | GCAATGTGGAGGTAATAGACG                               |                                                     |
| KOUvSorR2_5F        | AGTGTGCGAATGGTGGTGAT                                | <i>UvSorR2</i> transformants 5F and 3F<br>screening |
| KOUvSorR2_3R        | TCAGTTCGTCGTAGGTGGC                                 |                                                     |
| UvSorR2_spacer_F    | ACCTATATCGCGATCCGTACCGAG                            | Constructing pCas9-tRp-UvSorR2 vector               |
| UvSorR2_spacer_R    | AAACCTCGGTACGGATCGCGATAT                            |                                                     |
| GEN_F               | GAGGTTGCGATTTCTCTGCCGTATCTG                         | <i>GenR</i> amplification from pFL2                 |
| GEN_R               | GCCAGCAGTAGACACTTGGAATCTAAAC                        |                                                     |
| 855_R               | TGTTGGGTTTGAGCTAGGTGGG                              | Upstream /downstream flanks<br>amplification        |
| 856_F               | GAATGGTCAAATCAAACCTGCTAGATAT                        |                                                     |
| <i>β-tubulin</i> _F | AGGTTGCGTTGAAGGAGGTT                                | <i>U. virens β-tubulin</i> as the control           |
| <i>β-tubulin</i> _R | GAGGTGGAGTTGCCGATAAA                                |                                                     |
| RT_UvSorA_F         | CTTTTCGACGCGGCATTCTT                                | RT-qPCR for <i>UvSorA</i>                           |
| RT_UvSorA_R         | GCACAAAGACGCCAGTGAAG                                |                                                     |
| RT_UvSorB_F         | GGACCTCCATGTGGTTCCAG                                | RT-qPCR for <i>UvSorB</i>                           |
| RT_UvSorB_R         | TGATAGCGCTCTTCCCAACG                                |                                                     |
| RT_UvSorC_F         | CGTCTCTGTCCACGTCCTTG                                | RT-qPCR for <i>UvSorC</i>                           |
| RT_UvSorC_R         | CAGAGGCGTTGGCTGTTTTG                                |                                                     |
| RT_UvSorD_F         | CCATCCACGTTACCCCGATT                                | RT-qPCR for <i>UvSorD</i>                           |
| RT_UvSorD_R         | CCATGAGCCCTCCATCTTGG                                |                                                     |

|              |                      |                             |
|--------------|----------------------|-----------------------------|
| RT_UvSorR1_F | CAGGGCCTCCACCAAATTCT | RT-qPCR for <i>UvSorR1</i>  |
| RT_UvSorR1_R | AGGTGGCTGTTCTCGTCAAG |                             |
| RT_UvSorR2_F | GCGGTCGACACAGGAAGATT | RT-PqPCR for <i>UvSorR2</i> |
| RT_UvSorR2_R | CGCTGTGGCAGTGCAATTAG |                             |
| RT_UvSorT_F  | GGTCTATTGTGTAGCGCCGT | RT-qPCR for <i>UvSorT</i>   |
| RT_UvSorT_R  | GAACCGGTCCGTATGTCTCG |                             |
| RT-UvLaeA_F  | CTGCGAGGTCTGTGGTGAAT | RT-qPCR for <i>UvLaeA</i>   |
| RT-UvLaeA_R  | CTACCTCCCAACGTGCGATT |                             |
| RT-UvVeA_F   | GAGTAGTTACGCTGGGGCTC | RT-qPCR for <i>UvVeA</i>    |
| RT-UvVeA_R   | CCGTACATCAAGTCGGAGCA |                             |
| RT-UvVelB_F  | TGTAGCATTGCGTGCGATG  | RT-qPCR for <i>UvVelB</i>   |
| RT-UvVelB_R  | ACCCAGCCGTGATTCAACAT |                             |
| RT-UvPacC_F  | CAAGATTACGTCCGGTGCCT | RT-qPCR for <i>UvPacC</i>   |
| RT-UvPacC_R  | AGTTCCACTGGCACGTAAGG |                             |
| RT-UvAreA_F  | ATTCCCATCAAGCCTCGCAA | RT-qPCR for <i>UvAreA</i>   |
| RT-UvAreA_R  | CCAGCTGTGTTGCTGTTGAC |                             |
| RT-UvCreA_F  | GTGAATGGAGGAGGGGCATC | RT-qPCR for <i>UvCreA</i>   |
| RT-UvCreA_R  | CCCTCCTCACCCACCTTTTC |                             |

Note: This table is supplemental to the experimental procedure.



**Table S3.** Effects of carbon sources on contents and yields of main sorbicillinoids (trichotetronine, demethylthyltrichodimerol, trichodimerol) in *U. virens*.

| Carbon Source  | Trichotetronine  |                  | Demethylthyltrichodimerol |                  | Trichodimerol   |                  | Total Sorbicillinoids |                 |
|----------------|------------------|------------------|---------------------------|------------------|-----------------|------------------|-----------------------|-----------------|
|                | Content (mg/g)   | Yield (mg/L)     | Content (mg/g)            | Yield (mg/L)     | Content (mg/g)  | Yield (mg/L)     | Content (mg/g)        | Yield(mg/L)     |
| Soluble starch | 0.0884±0.0047 g  | 0.0440±0.0036 e  | 0.0000±0.0000 h           | 0.0000±0.0000 f  | 0.0202±0.0060 d | 0.0101±0.0033 g  | 0.1086±0.0106 f       | 0.0541±0.0068 e |
| Apple pectin   | 1.5433±0.0491 c  | 2.2503±0.3322 d  | 0.1257±0.0149 d           | 0.1820±0.0211 c  | 0.1263±0.0153 c | 0.1824±0.0143 e  | 1.7952±0.0594 c       | 2.6147±0.3532 d |
| Fructose       | 3.6631±0.2403 a  | 5.0723±0.5539 b  | 0.3163±0.0134 b           | 0.4377±0.0373 b  | 1.0997±0.0840 a | 1.5167±0.0504 a  | 5.0792±0.1789 a       | 7.0267±0.5415 a |
| Glucose        | 1.8514±0.0524 b  | 5.8074±0.2287 a  | 0.0496±0.0095 e           | 0.1555±0.0293 c  | 0.2243±0.0218 b | 0.7045±0.0821 c  | 2.1253±0.0768 b       | 6.6674±0.3243 a |
| Sucrose        | 1.4384±0.0775 cd | 4.7949±0.4608 bc | 0.0444±0.0032 ef          | 0.1476±0.0088 c  | 0.1064±0.0043 c | 0.3539±0.0127 d  | 1.5892±0.0795 d       | 5.2963±0.4791 c |
| Maltose        | 1.3233±0.0547 de | 4.5765±0.1734 c  | 0.1534±0.0083 c           | 0.5310±0.0390 a  | 0.2284±0.0230 b | 0.7880±0.0417 b  | 1.7050±0.0748 cd      | 5.8954±0.1863 b |
| Mannose        | 0.5929±0.0416 f  | 1.8978±0.0314 d  | 0.0187±0.0011 g           | 0.0602±0.0071 d  | 0.1201±0.0088 c | 0.3848±0.0250 d  | 0.7317±0.0447 e       | 2.3429±0.0126 d |
| Stachyose      | 0.1372±0.0202 g  | 0.1999±0.0111 e  | 0.0395±0.0026 ef          | 0.0582±0.0070 d  | 0.0323±0.0023 d | 0.0476±0.0067 fg | 0.2090±0.0240 f       | 0.3056±0.0219 e |
| Dextrin        | 0.1260±0.0206 g  | 0.1963±0.0086 e  | 0.0320±0.0068 fg          | 0.0510±0.0160 de | 0.0563±0.0018 d | 0.0888±0.0106 f  | 0.2143±0.0184 f       | 0.3361±0.0190 e |
| Lactose        | 0.1452±0.0280 g  | 0.0823±0.0045 e  | 0.0000±0.0000 h           | 0.0000±0.0000 f  | 0.0202±0.0017 c | 0.0116±0.0015 g  | 0.1654±0.0286 f       | 0.0939±0.0031 e |
| Galactose      | 1.2190±0.0669 e  | 0.2680±0.0144 e  | 0.3759±0.0126 a           | 0.0826±0.0010 d  | 0.1053±0.0115 d | 0.0232±0.0028 g  | 1.7003±0.0817 cd      | 0.3738±0.0177 e |

Note: All values represent mean ± standard deviation; values marked with different letters in each column indicate significant differences ( $p < 0.05$ ).

**Table S4.** Effects of nitrogen sources on contents and yields of main sorbicillinoids (trichotetronine, demethylthyltrichodimerol, trichodimerol) in *U. virens*.

| Nitrogen Source      | Trichotetronine   |                 | Demethylthyltrichodimerol |                  | Trichodimerol    |                 | Total Sorbicillinoids |                  |
|----------------------|-------------------|-----------------|---------------------------|------------------|------------------|-----------------|-----------------------|------------------|
|                      | Content (mg/g)    | Yield (mg/L)    | Content (mg/g)            | Yield (mg/L)     | Content (mg/g)   | Yield (mg/L)    | Content (mg/g)        | Yield(mg/L)      |
| Yeast extract        | 1.4102±0.1417 a   | 7.4642±1.1144 a | 0.2954±0.0198 b           | 0.5634±0.0513 b  | 0.2954±0.0198 cd | 1.5552±0.0221 c | 1.8127±0.1412 a       | 9.5828±1.1479 a  |
| Yeast extract powder | 0.0260±0.0013 h   | 0.1415±0.0077 e | 0.0105±0.0010 e           | 0.0571±0.0051 g  | 0.0244±0.0043 g  | 0.1326±0.0224 f | 0.0610±0.0060 g       | 0.3312±0.0308 f  |
| Beef extract         | 1.1222±0.0827 b   | 4.9952±0.2952 b | 0.1734±0.0105 a           | 0.7718±0.0209 a  | 0.3338±0.0154 bc | 1.4861±0.0389 c | 1.6294±0.1019 b       | 7.2531±0.3196 b  |
| Malt extract powder  | 0.5785±0.0727 de  | 2.0152±0.1082 d | 0.0356±0.0035 d           | 0.1242±0.0036 de | 0.1099±0.0083 e  | 0.3836±0.0028 e | 0.7240±0.0844 d       | 2.5230±0.1133 e  |
| Maize powder         | 0.6586±0.0147 d   | 2.1525±0.0192 d | 0.0330±0.0034 d           | 0.1079±0.0080 ef | 0.2499±0.0156 d  | 0.8166±0.0414 d | 0.9415±0.0293 c       | 3.0770±0.0346 de |
| Soybean powder       | 0.5404±0.0226 def | 1.9873±0.0332 d | 0.0413±0.0059 cd          | 0.1517±0.0195 de | 0.1062±0.0066 e  | 0.3903±0.0138 e | 0.6879±0.0324 de      | 2.5293±0.0504 e  |
| Nutrient broth       | 0.4531±0.0267 f   | 2.3228±0.4001 d | 0.0150±0.0021 e           | 0.0760±0.0028 fg | 0.0961±0.0071 ef | 0.4895±0.0553 e | 0.5642±0.0332 e       | 2.8883±0.4578 e  |
| Peptone              | 0.9858±0.0182 c   | 5.7209±0.0996 b | 0.0504±0.0059 c           | 0.2925±0.0336 c  | 0.5516±0.0180 a  | 3.2016±0.1219 a | 1.5878±0.0209 b       | 9.2150±0.1521 a  |
| Poly peptone         | 0.4643±0.0456 ef  | 2.4848±0.3151 d | 0.0308±0.0074 d           | 0.1619±0.0177 d  | 0.1442±0.0129 e  | 0.7728±0.1059 d | 0.6392±0.0642 de      | 3.4195±0.4210 d  |
| Tryptone             | 0.6018±0.0310 d   | 3.7598±0.6001 c | 0.0437±0.0065 cd          | 0.2689±0.0153 c  | 0.3556±0.0855 b  | 2.1761±0.3363 b | 1.0010±0.0734 c       | 6.2048±0.3780 c  |
| KNO <sub>3</sub>     | 0.3008±0.0109 g   | 0.8939±0.0124 e | 0.0146±0.0033 e           | 0.0433±0.0094 g  | 0.0462±0.0027 fg | 0.1374±0.0122 f | 0.3615±0.0112 f       | 1.0745±0.0209 f  |

Note: All values represent mean ± standard deviation; values marked with different letters in each column indicate significant differences ( $p < 0.05$ ).

**Table S5.** Effects of ambient pH on contents and yields of main sorbicillinoids (trichotetronine, demethylthyltrichodimerol, trichodimerol) in *U. virens*.

| Ambient<br>pH | Trichotetronine   |                 | Demethylthyltrichodimerol |                  | Trichodimerol   |                  | Total Sorbicillinoids |                  |
|---------------|-------------------|-----------------|---------------------------|------------------|-----------------|------------------|-----------------------|------------------|
|               | Content (mg/g)    | Yield (mg/L)    | Content (mg/g)            | Yield (mg/L)     | Content (mg/g)  | Yield (mg/L)     | Content (mg/g)        | Yield(mg/L)      |
| pH 3.5        | 1.8940±0.2754 a   | 3.3235±1.0248 a | 0.0193±0.0033 c           | 0.0327±0.0042 d  | 0.0756±0.0050 e | 0.1345±0.0499 f  | 1.9889±0.2721 a       | 3.4907±1.0718 bc |
| pH 4.0        | 1.4207±0.2375 b   | 3.4230±0.8297 b | 0.0643±0.0100 a           | 0.1529±0.0180 cd | 0.2675±0.0297 b | 0.6367±0.0484 de | 1.7525±0.2084 ab      | 4.2126±0.8146 bc |
| pH 4.5        | 1.0746±0.0253 c   | 5.7990±0.3861 c | 0.0528±0.0050 ab          | 0.2853±0.0361 bc | 0.4101±0.0153 a | 2.2105±0.0913 a  | 1.5375±0.0338 b       | 8.2949±0.4921 a  |
| pH 5.0        | 0.8891±0.0274 c   | 6.4376±0.2469 a | 0.0477±0.0067 ab          | 0.3455±0.0523 ab | 0.2008±0.0174 c | 1.4543±0.1422 b  | 1.1375±0.0277 c       | 8.2374±0.3194 a  |
| pH 5.5        | 0.4322±0.1116 d   | 3.1214±0.7718 b | 0.0562±0.0283 ab          | 0.4162±0.2246 ab | 0.1185±0.0276 d | 0.8546±0.1796 c  | 0.6069±0.0858 d       | 4.3922±0.6022 b  |
| pH 6.0        | 0.2483±0.0402 de  | 1.9917±0.1714 c | 0.0606±0.0083 ab          | 0.4865±0.0283 a  | 0.0827±0.0117 e | 0.6722±0.1323 cd | 0.3916±0.0381 de      | 3.1504±0.0512 cd |
| pH 6.5        | 0.1919±0.0075 def | 1.4139±0.0823 c | 0.0422±0.0026 b           | 0.3111±0.0264 bc | 0.0619±0.0017 e | 0.4561±0.0082 e  | 0.2960±0.0085 ef      | 2.1811±0.1066 d  |
| pH 7.0        | 0.0774±0.0064 e   | 0.5007±0.0401 d | 0.0159±0.0013 c           | 0.1029±0.0084 d  | 0.0283±0.0024 f | 0.1833±0.0159 f  | 0.1217±0.0078 fg      | 0.7869±0.0484 e  |
| pH 7.5        | 0.0255±0.0038 e   | 0.0680±0.0087 d | 0.0098±0.0002 c           | 0.0261±0.0012 d  | 0.0118±0.0013 f | 0.0315±0.0039 f  | 0.0471±0.0051 g       | 0.1257±0.0123 e  |

Note: All values represent mean ± standard deviation; values marked with different letters in each column indicate significant differences ( $p < 0.05$ ).

**Table S6.** Effects of light exposure on contents and yields of main sorbicillinoids (trichotetronine, demethylthyltrichodimerol, trichodimerol) in *U. virens*.

| Light | Trichotetronine |                 | Demethylthyltrichodimerol |                 | Trichodimerol   |                 | Total Sorbicillinoids |                  |
|-------|-----------------|-----------------|---------------------------|-----------------|-----------------|-----------------|-----------------------|------------------|
|       | Content (mg/g)  | Yield (mg/L)    | Content (mg/g)            | Yield (mg/L)    | Content (mg/g)  | Yield (mg/L)    | Content (mg/g)        | Yield(mg/L)      |
| DD    | 0.9162±0.0638 c | 4.9952±0.2952 a | 0.1416±0.0076 b           | 0.7718±0.0209 b | 0.2540±0.0427 c | 1.3831±0.2109 a | 1.3118±0.1085 c       | 7.1501±0.4864 ab |
| DL    | 1.6071±0.3253 b | 5.8267±0.9588 a | 0.2996±0.0112 a           | 1.0911±0.0214 a | 0.3692±0.0669 b | 1.3382±0.1743 a | 2.2759±0.4002 b       | 8.2560±1.1168 a  |
| LL    | 3.7917±0.4554 a | 4.9648±0.1285 a | 0.3681±0.0722 a           | 0.4829±0.0786 c | 0.9557±0.0488 a | 1.2616±0.1442 a | 5.1154±0.5027 a       | 6.7093±0.1320 b  |

Note: DD, 24 h darkness/day; LL, 24 h light/day; DL, 12 h darkness-12 h light/day: All values represent mean ± standard deviation. The values marked with different letters in each column indicate significant differences ( $p < 0.05$ ).
